# Supplementary material for: High-precision stable zirconium isotope ratio measurements by double spike thermal ionization mass spectrometry
Source: Royal Society of Chemistry journal article supplement (doi:10.1039/c9ja00385a), 2020-01-01
Supplement: c9ja00385a1.xlsx [file c9ja00385a1.xlsx]

## Sheet: Sheet1
Table S1. The Zr isotopic compositions of eleven geological reference materials determined by DS-TIMS in this study.
Reference material	95Mo/90Zr	Double spike (%)	δ94ZrSRM 3169 (‰)	Uncertaintya	N
BCR-2	0.000602706	43.1995	-0.0550566	0.0255001
	0.00104035	40.9836	-0.0470721	0.0274683
	0.000703673	43.4271	0.0241922	0.0218002
	0.000809433	43.6453	-0.01672	0.0219678
	0.000920125	44.5844	-0.0523545	0.0246788
	0.000609863	42.9415	0.00649108	0.0218278
	0.000677054	42.9304	0.00358507	0.0190344
	0.000355069	42.4464	-0.00223698	0.0253173
	0.000646285	42.805	0.00394515	0.0244669
	0.000817215	43.295	-0.0344057	0.0306963
Average			-0.0169632	0.0567044	10
BHVO-2	0.000613199	42.712	-0.0386051	0.0281814
	0.000471992	42.9599	-0.0228172	0.0251882
	0.000844426	43.041	-0.0638218	0.0317096
	0.000327944	43.2659	-0.0600912	0.0263992
	0.000322753	43.5967	-0.014563	0.0203315
	0.000573992	43.0815	-0.0240358	0.0238186
	0.000708031	42.7553	-0.0320877	0.0219361
	0.000721212	43.3927	0.000586538	0.0249074
Average			-0.0319294	0.0438114	8
AGV-2	0.00089773	43.8809	-0.0605384	0.0222484
	0.000318825	43.6448	-0.0920044	0.0253819
	0.000393983	43.1368	-0.0538024	0.0258129
	0.000877328	41.9245	-0.0379093	0.0249454
	0.000492018	42.926	-0.0161634	0.0216024
	0.000786255	43.3604	-0.0484182	0.0267322
Average			-0.0514727	0.0503625	6
DNC-1	0.000569769	45.4996	0.06382	0.0236501
	0.00164985	45.2936	0.0975466	0.0272419
	0.000972139	46.8632	0.0244267	0.0229085
	0.00384362	46.4124	0.0372808	0.0392366
	0.00148074	46.7736	0.0592113	0.0272986
	0.000342682	46.8787	0.108613	0.0270434
	0.00128365	46.335	0.0842031	0.040176
	0.00178869	45.8167	0.10982	0.0350398
	0.00128702	45.6883	0.0823375	0.0233293
Average			0.07414	0.0605689	9
W-2a	0.000354813	45.9639	-0.0364066	0.0303272
	0.000511837	46.2799	-0.0223245	0.0270112
	0.000685511	44.3653	-0.0534515	0.0257118
	0.00117892	44.7743	-0.0295412	0.0276326
	0.000270746	45.1612	-0.0805956	0.0346609
	0.000527923	44.1954	-0.0427357	0.0323313
	0.00114684	45.5904	0.00566669	0.0263026
	0.00119653	45.1289	-0.0395986	0.0542959
	0.00191397	44.244	0.0030017	0.0241926
	0.00133151	43.4649	-0.0074972	0.0230765
	0.000526528	45.5413	-0.0452985	0.0361245
Average			-0.0317074	0.0511233	11
RGM-2	0.000665735	43.4603	0.0278565	0.0278377
	0.000421726	43.4401	0.0535648	0.0258231
	0.00136269	42.5403	0.0171101	0.0225267
	0.00286403	42.3518	0.0232131	0.0264141
	0.000972889	41.7874	0.0541615	0.0236904
	0.000875296	42.239	0.0147135	0.0272965
	0.000749062	41.8653	0.039412	0.0238148
Average			0.0328617	0.0328717	7
GSR-1	0.00110224	45.5906	0.117813	0.0235052
	0.000669112	42.423	0.141066	0.0240157
	0.00140316	42.5613	0.122138	0.0228565
	0.000736576	41.5444	0.183368	0.025604
Average			0.141096	0.0598714	4
GSP-2	0.000442059	40.8403	0.0350589	0.0228559
	0.00207168	42.7069	0.0154812	0.0259127
	0.00081168	43.5912	0.00941523	0.0257742
	0.00103469	42.7898	-0.0200344	0.0197392
	0.000740982	42.9589	0.0396493	0.0251397
	0.00231759	42.2322	0.0231087	0.0263141
	0.00110475	42.352	0.0587477	0.0257452
Average			0.0230609	0.0502894	7
JG-2	0.00127927	39.3185	0.320531	0.0277323
	0.00164369	38.7006	0.402194	0.0243982
	0.000693385	38.3731	0.377999	0.0387086
	0.000403358	45.0422	0.351911	0.0179101
	0.000422958	46.2327	0.339666	0.0228834
	0.000259473	45.1565	0.330657	0.0217159
	0.00082364	46.5153	0.349063	0.0205149
Average			0.353146	0.056526	7
SBC-1	0.00109954	45.1952	-0.046307	0.0194295
	0	43.1575	-0.0364507	0.0448749
	0.00078563	44.3726	-0.0558845	0.0220457
	0.000950571	42.6147	0.0270732	0.0245629
	0.00337577	42.7169	-0.0242005	0.0240379
	0.00270251	42.3937	-0.00266802	0.0235853
	0.000603553	46.0173	-0.0528084	0.0221466
	0.00113319	42.794	-0.00645331	0.0269096
	0.00183141	42.8216	0.00603112	0.0219809
	0.000918237	42.5528	0.0107505	0.0233051
Average			-0.0180918	0.0582371	10
SGR-1	0.00139918	42.99	-0.0293402	0.0250142
	0.00067207	43.6776	-0.013346	0.0235991
	0.000707291	41.8621	0.00939452	0.0228464
	0.00163263	46.9443	-0.0358797	0.0259725
	0.00139848	46.7543	-0.0064803	0.0240678
	0.00333461	45.4605	0.00228237	0.0308096
	0.0015174	47.1249	-0.0339639	0.0233535
Average			-0.0153333	0.0362358	7
a The uncertainty of each replicate(independent digest) is estimated by doubling the standard error (2 SE) of the mean value of 120 cycles; Bold 2SD is the two standard deviation of mean value of different replicates of each geological RM.
